# Supplementary material for: Anchored Inferential Learning: Platform-Specific Uncertainty, Venture Capital Investments by the Platform Owner, and the Impact on Complementors
Source: Atypon-hosted journal article supplement (doi:10.1287/orsc.2022.1607), 2022-06-13
Supplement: orsc.2022.1607.sm1.pdf [file orsc.2022.1607.sm1.pdf]

## APPENDIX

### **Anchored Inferential Learning: Platform-Specific Uncertainty, Venture Capital Investments by the Platform Owner, and the Impact on Complementors**

#### **Appendix A: Information on AppExchange**

Figure A1. Product Category Structure in the AppExchange App Store of the Salesforce Platform Ecosystem

#### **Appendix B: Additional Quantitative Analyses**

Table B1. Estimation Results for Falsification Exercises in the App Introduction Analyses

Table B2. Estimation Results for Falsification Exercises in the App Withdrawal Analyses

Table B3. Split Sample Analyses Estimating the Effect of PVC on App Introductions for Complementors with and without Access to Venture Financing and for Small and Large Complementors

Table B4. Split Sample Analyses Estimating the Effect of PVC on App Withdrawals for Complementors with and without Access to Venture Financing and for Small and Large Complementors

Table B5. Analyses Comparing the Effect of Different Types of PVC Investments on App Introductions

Table B6. Analyses Comparing the Effect of Different Types of PVC Investments on App Withdrawals

Table B7. Ordinary Least Squares Estimates of the Effect of PVC on the Log-Transformed Number of App Introductions

Table B8. Cloglog Estimates of the Effect of PVC on App Withdrawals

Table B9. Alternative Moderator Specifications in the App Introduction Analyses

Table B10. Alternative Moderator Specifications in the App Withdrawal Analyses

Table B11. Subsample Analyses Estimating the Effect of PVC on App Introduction for Incumbent Complementors

Table B12. Subsample Analyses Estimating the Effect of PVC on App Withdrawal for Incumbent Complementors

## Appendix A: Information on AppExchange

Figure A1. Product Category Structure in the AppExchange App Store of the Salesforce Platform

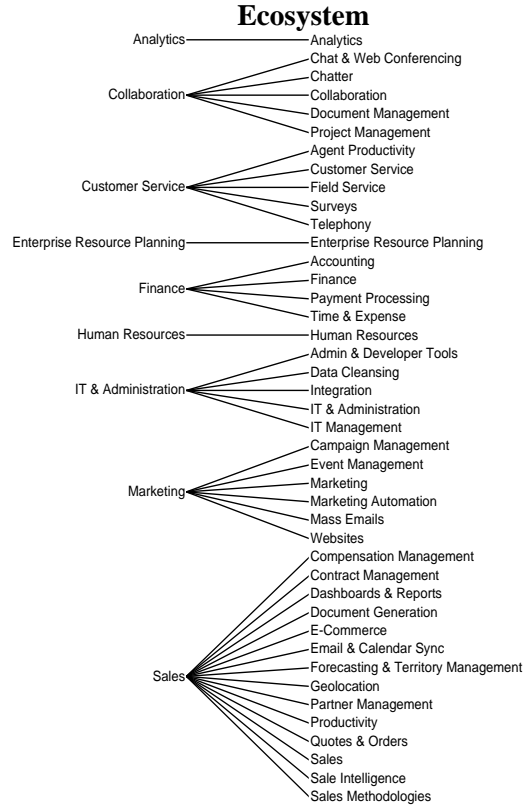

## Appendix B: Additional Quantitative Analyses

**Table B1. Estimation Results for Falsification Exercises in the App Introduction Analyses**

| Variable                                 | 1                          | 2                          | 3                          |
|------------------------------------------|----------------------------|----------------------------|----------------------------|
| CVC by other organization in subcategory | -0.000092<br>(0.00017)     |                            |                            |
| PVC in related subcategory               |                            | 0.000026<br>(0.00011)      |                            |
| Placebo PVC in subcategory               |                            |                            | 0.000049<br>(0.00015)      |
| Platform ecosystem experience (ln)       | -0.0017***<br>(0.00015)    | -0.0017***<br>(0.00015)    | -0.0017***<br>(0.00015)    |
| App introductions in subcategory         | -0.000086***<br>(0.000028) | -0.000085***<br>(0.000028) | -0.000085***<br>(0.000028) |
| App withdrawals in subcategory           | 0.000097<br>(0.000072)     | 0.000098<br>(0.000071)     | 0.000097<br>(0.000071)     |
| Apps by platform provider in subcategory | -0.00049***<br>(0.00017)   | -0.00049***<br>(0.00017)   | -0.00049***<br>(0.00017)   |
| Subcategory market size (ln)             | 0.00020<br>(0.00021)       | 0.00020<br>(0.00021)       | 0.00020<br>(0.00021)       |
| Complementor scope                       | -0.0037***<br>(0.00025)    | -0.0037***<br>(0.00025)    | -0.0037***<br>(0.00025)    |
| Apps by complementor in subcategory      | 0.0036***<br>(0.00057)     | 0.0036***<br>(0.00057)     | 0.0036***<br>(0.00057)     |
| Complementor performance                 | -0.00021<br>(0.00014)      | -0.00021<br>(0.00014)      | -0.00021<br>(0.00014)      |
| Complementor fixed effects               | Yes                        | Yes                        | Yes                        |
| Category fixed effects                   | Yes                        | Yes                        | Yes                        |
| Month fixed effects                      | Yes                        | Yes                        | Yes                        |
| Number of complementors                  | 1,415                      | 1,415                      | 1,415                      |
| Number of observations                   | 761,376                    | 761,376                    | 761,376                    |
| R <sup>2</sup>                           | 0.0059                     | 0.0059                     | 0.0059                     |

*Notes.* Coefficients are reported with robust standard errors, clustered at the level of the complementor, in parentheses. The constant is estimated but not reported. Coefficients are from linear probability models estimating the likelihood of app introduction. CVC by other organization in subcategory is a dummy variable capturing whether a complementor in a subcategory received a CVC investment from a corporate investor other than the platform provider. PVC in subcategory is a dummy variable capturing whether a PVC investment happened in a related subcategory but not in the affected subcategory itself (i.e., a subcategory nested in the same main category). Placebo PVC is a dummy variable that takes a positive value in the three months before a PVC investment took place.

\* p < 0.10; \*\* p < 0.05; \*\*\* p < 0.01.

**Table B2. Estimation Results for Falsification Exercises in the App Withdrawal Analyses**

| <b>Variable</b>                          | <b>1</b>               | <b>2</b>               | <b>3</b>               |
|------------------------------------------|------------------------|------------------------|------------------------|
| CVC by other organization in subcategory | 0.0026<br>(0.0027)     |                        |                        |
| PVC in related subcategory               |                        | 0.0011<br>(0.0012)     |                        |
| Placebo PVC in subcategory               |                        |                        | 0.00094<br>(0.0018)    |
| Platform ecosystem experience (ln)       | -0.0019<br>(0.0019)    | -0.0019<br>(0.0019)    | -0.0019<br>(0.0019)    |
| App introductions in subcategory         | -0.00011<br>(0.00016)  | -0.00011<br>(0.00016)  | -0.00011<br>(0.00016)  |
| App withdrawals in subcategory           | 0.00066<br>(0.00047)   | 0.00075<br>(0.00050)   | 0.00073<br>(0.00050)   |
| Apps by platform provider in subcategory | -0.0039**<br>(0.0015)  | -0.0039***<br>(0.0015) | -0.0038**<br>(0.0015)  |
| Subcategory market size (ln)             | 0.0017<br>(0.0041)     | 0.0016<br>(0.0040)     | 0.0015<br>(0.0040)     |
| Complementor scope                       | -0.0034*<br>(0.0020)   | -0.0034*<br>(0.0020)   | -0.0034*<br>(0.0020)   |
| Apps by complementor in subcategory      | 0.016**<br>(0.0064)    | 0.016**<br>(0.0064)    | 0.016**<br>(0.0064)    |
| App performance                          | 0.0010<br>(0.0024)     | 0.0010<br>(0.0024)     | 0.0010<br>(0.0024)     |
| App age                                  | 0.0019<br>(0.0024)     | 0.0020<br>(0.0024)     | 0.0020<br>(0.0024)     |
| Number of ratings (ln)                   | -0.0061***<br>(0.0014) | -0.0062***<br>(0.0014) | -0.0061***<br>(0.0014) |
| Rating valence                           | 0.00091<br>(0.00071)   | 0.00096<br>(0.00071)   | 0.00094<br>(0.00071)   |
| App fixed effects                        | Yes                    | Yes                    | Yes                    |
| Month fixed effects                      | Yes                    | Yes                    | Yes                    |
| Number of apps                           | 2,158                  | 2,158                  | 2,158                  |
| Number of observations                   | 21,893                 | 21,893                 | 21,893                 |
| R <sup>2</sup>                           | 0.010                  | 0.010                  | 0.010                  |

*Notes.* Coefficients are reported with robust standard errors, clustered at the level of the app, in parentheses. The constant is estimated but not reported. Coefficients are from linear probability models estimating the likelihood of app withdrawal. CVC by other organization in subcategory is a dummy variable capturing whether a complementor in a subcategory received a CVC investment from a corporate investor other than the platform provider. PVC in subcategory is a dummy variable capturing whether a PVC investment happened in a related subcategory but not in the affected subcategory itself (i.e., a subcategory nested in the same main category). Placebo PVC is a dummy variable that takes a positive value in the three months before a PVC investment took place.

\*  $p < 0.10$ ; \*\*  $p < 0.05$ ; \*\*\*  $p < 0.01$ .

**Table B3. Split Sample Analyses Estimating the Effect of PVC on App Introductions for Complementors with and without Access to Venture Financing and for Small and Large Complementors**

| Variable                   | Venture Financing     |                      |               | Complementor size    |                       |               |
|----------------------------|-----------------------|----------------------|---------------|----------------------|-----------------------|---------------|
|                            | Not<br>financed       | Financed             | $\chi^2$ test | Small                | Large                 | $\chi^2$ test |
|                            | 1                     | 2                    | 3             | 4                    | 5                     | 6             |
| PVC in subcategory         | 0.00036*<br>(0.00020) | 0.00046<br>(0.00038) | 0.050         | 0.00034<br>(0.00026) | 0.00040*<br>(0.00024) | 0.030         |
| Control variables included | Yes                   | Yes                  |               | Yes                  | Yes                   |               |
| Complementor fixed effects | Yes                   | Yes                  |               | Yes                  | Yes                   |               |
| Subcategory fixed effects  | Yes                   | Yes                  |               | Yes                  | Yes                   |               |
| Month fixed effects        | Yes                   | Yes                  |               | Yes                  | Yes                   |               |
| Number of complementors    | 1,193                 | 242                  |               | 710                  | 705                   |               |
| Number of observations     | 629,790               | 131,586              |               | 382,336              | 379,050               |               |
| R <sup>2</sup>             | 0.0058                | 0.0059               |               | 0.0058               | 0.0060                |               |

*Notes.* Coefficients are reported with robust standard errors, clustered at the level of the complementor, in parentheses. Coefficients are from linear probability models estimating the likelihood of app introduction for complementors with and without preexisting access to venture financing and for small and large complementors. Complementors are assigned to the small or large complementor subsample, in terms of number of employees, by means of a median split (Med = 21). Columns 3 and 6 present the results of cross-model hypothesis tests, using the  $\chi^2$  test statistic. A significant test statistic indicates that the estimated coefficients across the subsamples are different.

\*  $p < 0.10$ ; \*\*  $p < 0.05$ ; \*\*\*  $p < 0.01$ .

**Table B4. Split Sample Analyses Estimating the Effect of PVC on App Withdrawals for Complementors with and without Access to Venture Financing and for Small and Large Complementors**

| Variable                   | Venture financing     |                     |               | Complementor size     |                     |               |
|----------------------------|-----------------------|---------------------|---------------|-----------------------|---------------------|---------------|
|                            | Not                   | Financed            | $\chi^2$ test | Small                 | Large               | $\chi^2$ test |
|                            | Financed              |                     |               |                       |                     |               |
|                            | 1                     | 2                   | 3             | 4                     | 5                   | 6             |
| PVC in subcategory         | -0.0036**<br>(0.0018) | -0.0014<br>(0.0033) | 0.37          | -0.0053**<br>(0.0023) | -0.0014<br>(0.0022) | 1.58          |
| Control variables included | Yes                   | Yes                 |               | Yes                   | Yes                 |               |
| App fixed effects          | Yes                   | Yes                 |               | Yes                   | Yes                 |               |
| Week fixed effects         | Yes                   | Yes                 |               | Yes                   | Yes                 |               |
| Number of apps             | 1,776                 | 382                 |               | 1,073                 | 1,085               |               |
| Number of observations     | 17,945                | 3,948               |               | 10,826                | 11,067              |               |
| R <sup>2</sup>             | 0.010                 | 0.028               |               | 0.010                 | 0.014               |               |

*Notes.* Coefficients are reported with robust standard errors, clustered at the level of the app, in parentheses. Coefficients are from linear probability models estimating the likelihood of app withdrawal for complementors with and without preexisting access to venture financing and for small and large complementors. Complementors are assigned to the small or large complementor subsample, in terms of number of employees, by means of a median split (Med = 25). Columns 3 and 6 present the results of cross-model hypothesis tests, using the  $\chi^2$  test statistic. A significant test statistic indicates that the estimated coefficients across the subsamples are different.

\*  $p < 0.10$ ; \*\*  $p < 0.05$ ; \*\*\*  $p < 0.01$ .

**Table B5. Analyses Comparing the Effect of Different Types of PVC Investments on App Introductions**

| Variable                       | Early and late-stage PVC |                   | Lead and syndicated PVC |                   |
|--------------------------------|--------------------------|-------------------|-------------------------|-------------------|
|                                | Estimates                | Wald test         | Estimates               | Wald test         |
|                                | 1                        | 2                 | 3                       | 4                 |
| Early-stage PVC in subcategory | 0.00052**                | 1.59<br>(0.00023) |                         |                   |
| Late-stage PVC in subcategory  | 0.00012                  | (0.00026)         |                         |                   |
| Lead PVC in subcategory        |                          |                   | 0.00048*                | 0.22<br>(0.00039) |
| Syndicated PVC in subcategory  |                          |                   | 0.00033                 | (0.00020)         |
| Control variables included     | Yes                      |                   | Yes                     |                   |
| Complementor fixed effects     | Yes                      |                   | Yes                     |                   |
| Subcategory fixed effects      | Yes                      |                   | Yes                     |                   |
| Month fixed effects            | Yes                      |                   | Yes                     |                   |
| Number of complementors        | 1,415                    |                   | 1,415                   |                   |
| Number of observations         | 761,376                  |                   | 761,376                 |                   |
| R <sup>2</sup>                 | 0.0059                   |                   | 0.0059                  |                   |

*Notes.* Coefficients are reported with robust standard errors, clustered at the level of the complementor, in parentheses. The constant is estimated but not reported. Coefficients are from linear probability models estimating the likelihood of app introduction. Columns 2 and 4 present the results of Wald tests comparing the equality of the estimated coefficients. A significant test statistic indicates that the estimated coefficients are different.

\*  $p < 0.10$ ; \*\*  $p < 0.05$ ; \*\*\*  $p < 0.01$ .

**Table B6. Analyses Comparing the Effect of Different Types of PVC Investments on App Withdrawals**

| Variable                       | Early and late-stage PVC |           | Lead and syndicated PVC |           |
|--------------------------------|--------------------------|-----------|-------------------------|-----------|
|                                | Estimates                | Wald test | Estimates               | Wald test |
|                                | 1                        | 2         | 3                       | 4         |
| Early-stage PVC in subcategory | -0.0031**<br>(0.0016)    | 0.010     |                         |           |
| Late-stage PVC in subcategory  | -0.0036*<br>(0.0039)     |           |                         |           |
| Lead PVC in subcategory        |                          |           | -0.0034*<br>(0.0018)    | 0.010     |
| Syndicated PVC in subcategory  |                          |           | -0.0036*<br>(0.0021)    |           |
| Control variables included     | Yes                      |           | Yes                     |           |
| App fixed effects              | Yes                      |           | Yes                     |           |
| Month fixed effects            | Yes                      |           | Yes                     |           |
| Number of apps                 | 2,158                    |           | 2,158                   |           |
| Number of observations         | 21,893                   |           | 21,893                  |           |
| R <sup>2</sup>                 | 0.010                    |           | 0.010                   |           |

*Notes.* Coefficients are reported with robust standard errors, clustered at the level of the app, in parentheses. The constant is estimated but not reported. Coefficients are from linear probability models estimating the likelihood of app withdrawal. Columns 2 and 4 present the results of Wald tests comparing the equality of the estimated coefficients. A significant test statistic indicates that the estimated coefficients are different. \*  $p < 0.10$ ; \*\*  $p < 0.05$ ; \*\*\*  $p < 0.01$ .

**Table B7. Ordinary Least Squares Estimates of the Effect of PVC on the Log-Transformed Number of App Introductions**

| Variable                                                | 1                          | 2                          | 3                          |
|---------------------------------------------------------|----------------------------|----------------------------|----------------------------|
| PVC in subcategory                                      | 0.00026*<br>(0.00014)      | 0.0020***<br>(0.00041)     | 0.000074<br>(0.00015)      |
| Platform ecosystem experience (ln)                      | -0.0015***<br>(0.00013)    | -0.0014***<br>(0.00013)    | -0.0015***<br>(0.00013)    |
| PVC in subcategory x platform ecosystem experience (ln) |                            | -0.00062*<br>(0.00011)     |                            |
| PVC in subcategory x exclusive platform focus           |                            |                            | 0.00053**<br>(0.00025)     |
| App introductions in subcategory                        | -0.000084***<br>(0.000022) | -0.000085***<br>(0.000022) | -0.000084***<br>(0.000022) |
| App withdrawals in subcategory                          | 0.000041<br>(0.000054)     | 0.000042<br>(0.000054)     | 0.000041<br>(0.000054)     |
| Apps by platform provider in subcategory                | -0.00043***<br>(0.00014)   | -0.00042***<br>(0.00014)   | -0.00043***<br>(0.00014)   |
| Subcategory market size (ln)                            | 0.00016<br>(0.00017)       | 0.00016<br>(0.00017)       | 0.00016<br>(0.00017)       |
| Complementor scope                                      | -0.0029***<br>(0.00022)    | -0.0030***<br>(0.00022)    | -0.0030***<br>(0.00022)    |
| Apps by complementor in subcategory                     | 0.0030***<br>(0.00047)     | 0.0030***<br>(0.00047)     | 0.0030***<br>(0.00048)     |
| Complementor performance                                | -0.00011<br>(0.00012)      | -0.00011<br>(0.00012)      | -0.00011<br>(0.00012)      |
| Complementor fixed effects                              | Yes                        | Yes                        | Yes                        |
| Subcategory fixed effects                               | Yes                        | Yes                        | Yes                        |
| Month fixed effects                                     | Yes                        | Yes                        | Yes                        |
| Number of complementors                                 | 1,415                      | 1,415                      | 1,415                      |
| Number of observations                                  | 761,376                    | 761,376                    | 761,376                    |
| R <sup>2</sup>                                          | 0.0060                     | 0.0062                     | 0.0060                     |

*Notes.* Coefficients are reported with robust standard errors, clustered at the level of the complementor, in parentheses. The constant is estimated but not reported. Coefficients are from ordinary least squares regressions estimating the log-transformed number of app introductions.

\* p < 0.10; \*\* p < 0.05; \*\*\* p < 0.01.

**Table B8. Cloglog Estimates of the Effect of PVC on App Withdrawals**

| <b>Variable</b>                                         | <b>1</b>             | <b>2</b>             | <b>3</b>             |
|---------------------------------------------------------|----------------------|----------------------|----------------------|
| PVC in subcategory                                      | -0.602**<br>(0.249)  | -1.422***<br>(0.541) | -0.321<br>(0.287)    |
| Platform ecosystem experience (ln)                      | -0.106<br>(0.899)    | -0.126<br>(0.101)    | -0.100<br>(0.100)    |
| PVC in subcategory x platform ecosystem experience (ln) |                      | 0.229*<br>(0.129)    |                      |
| Exclusive platform focus                                | -0.201<br>(0.183)    | -0.203<br>(0.184)    | -0.104<br>(0.187)    |
| PVC in subcategory x exclusive platform focus           |                      |                      | -0.960*<br>(0.569)   |
| App introductions in subcategory                        | -0.0014<br>(0.023)   | -0.0028<br>(0.024)   | -0.0040<br>(0.023)   |
| App withdrawals in subcategory                          | 0.124**<br>(0.060)   | 0.125**<br>(0.060)   | 0.128**<br>(0.060)   |
| Apps by platform provider in subcategory                | -0.197**<br>(0.077)  | -0.195**<br>(0.076)  | -0.199**<br>(0.077)  |
| Subcategory market size (ln)                            | 0.0032<br>(0.095)    | 0.0043<br>(0.095)    | 0.0067<br>(0.095)    |
| Complementor scope                                      | -0.010<br>(0.075)    | -0.015<br>(0.076)    | -0.012<br>(0.075)    |
| Apps by complementor in subcategory                     | 0.305***<br>(0.057)  | 0.300***<br>(0.057)  | 0.300***<br>(0.057)  |
| App performance                                         | -0.173<br>(0.301)    | -0.172<br>(0.300)    | -0.171<br>(0.301)    |
| App age                                                 | -0.0060<br>(0.0050)  | -0.0061<br>(0.0050)  | -0.0061<br>(0.0050)  |
| Number of ratings (ln)                                  | 0.045<br>(0.118)     | 0.045<br>(0.119)     | 0.046<br>(0.118)     |
| Rating valence                                          | -0.145***<br>(0.054) | -0.145***<br>(0.054) | -0.145***<br>(0.054) |
| Month fixed effects                                     | Yes                  | Yes                  | Yes                  |
| Number of apps                                          | 2,158                | 2,158                | 2,158                |
| Number of observations                                  | 21,893               | 21,893               | 21,893               |
| Log-likelihood                                          | -886.179             | -885.263             | -884.734             |

*Notes.* Coefficients are reported with robust standard errors, clustered at the level of the app, in parentheses. The constant is estimated but not reported. Coefficients are from complementary log-log transformation (i.e., cloglog) discrete-time proportional hazard models estimating the likelihood of app withdrawal. As cloglog models require within-variance for estimation, app and subcategory fixed effects are omitted because observations on apps and subcategories without app withdrawals would otherwise be dropped.

\*  $p < 0.10$ ; \*\*  $p < 0.05$ ; \*\*\*  $p < 0.01$ .

**Table B9. Alternative Moderator Specifications in the App Introduction Analyses**

| <b>Variable</b>                                         | <b>1</b>                   | <b>2</b>                   | <b>3</b>                   |
|---------------------------------------------------------|----------------------------|----------------------------|----------------------------|
| PVC in subcategory                                      | 0.00037**<br>(0.00018)     | 0.0029***<br>(0.00055)     | 0.00043**<br>(0.00019)     |
| Platform ecosystem experience (ln)                      | -0.00060***<br>(0.00013)   | -0.00050***<br>(0.00013)   | -0.00061***<br>(0.00013)   |
| PVC in subcategory x platform ecosystem experience (ln) |                            | -0.0010***<br>(0.00016)    |                            |
| PVC in subcategory x multihoming                        |                            |                            | -0.00072*<br>(0.00041)     |
| App introductions in subcategory                        | -0.000084***<br>(0.000028) | -0.000086***<br>(0.000028) | -0.000084***<br>(0.000028) |
| App withdrawals in subcategory                          | 0.000094<br>(0.000071)     | 0.000094<br>(0.000071)     | 0.000094<br>(0.000071)     |
| Apps by platform provider in subcategory                | -0.00049***<br>(0.00017)   | -0.00048***<br>(0.00017)   | -0.00049***<br>(0.00017)   |
| Subcategory market size (ln)                            | 0.00021<br>(0.00021)       | 0.00022<br>(0.00021)       | 0.00021<br>(0.00021)       |
| Complementor scope                                      | -0.0046***<br>(0.00022)    | -0.0046***<br>(0.00021)    | -0.0046***<br>(0.00021)    |
| Apps by complementor in subcategory                     | 0.0036***<br>(0.00057)     | 0.0036***<br>(0.00057)     | 0.0036***<br>(0.00057)     |
| Complementor performance                                | -0.00020<br>(0.00013)      | -0.00020<br>(0.00013)      | -0.00020<br>(0.00013)      |
| Complementor fixed effects                              | Yes                        | Yes                        | Yes                        |
| Category fixed effects                                  | Yes                        | Yes                        | Yes                        |
| Month fixed effects                                     | Yes                        | Yes                        | Yes                        |
| Number of complementors                                 | 1,415                      | 1,415                      | 1,415                      |
| Number of observations                                  | 761,376                    | 761,376                    | 761,376                    |
| R <sup>2</sup>                                          | 0.0058                     | 0.0060                     | 0.0058                     |

*Notes.* Coefficients are reported with robust standard errors, clustered at the level of the complementor, in parentheses. The constant is estimated but not reported. Coefficients are from linear probability models estimating the likelihood of app introduction. Platform ecosystem experience is measured as the log-transformed number of months since the oldest app by a complementor was released. Multihoming is a dummy variable that takes a positive value if a complementor has apps in competing platform ecosystems and is reflective of a lack of an exclusive platform focus.

\* p < 0.10; \*\* p < 0.05; \*\*\* p < 0.01.

**Table B10. Alternative Moderator Specifications in the App Withdrawal Analyses**

| <b>Variable</b>                                         | <b>1</b>               | <b>2</b>               | <b>3</b>               |
|---------------------------------------------------------|------------------------|------------------------|------------------------|
| PVC in subcategory                                      | -0.0032**<br>(0.0016)  | -0.014**<br>(0.0061)   | -0.0043***<br>(0.0016) |
| Platform ecosystem experience (ln)                      | -0.0061**<br>(0.0028)  | -0.0049*<br>(0.0029)   | -0.0060**<br>(0.0028)  |
| PVC in subcategory x platform ecosystem experience (ln) |                        | 0.0032*<br>(0.0018)    |                        |
| PVC in subcategory x multihoming                        |                        |                        | 0.014*<br>(0.0080)     |
| App introductions in subcategory                        | -0.000057<br>(0.00016) | -0.000028<br>(0.00016) | -0.000043<br>(0.00016) |
| App withdrawals in subcategory                          | 0.00074<br>(0.00049)   | 0.00070<br>(0.00049)   | 0.00074<br>(0.00049)   |
| Apps by platform provider in subcategory                | -0.0037**<br>(0.0015)  | -0.0038**<br>(0.0015)  | -0.0038**<br>(0.0015)  |
| Subcategory market size (ln)                            | 0.00065<br>(0.0040)    | 0.0011<br>(0.0041)     | 0.0012<br>(0.0040)     |
| Complementor scope                                      | -0.0045**<br>(0.0022)  | -0.0044**<br>(0.0022)  | -0.0044**<br>(0.0022)  |
| Apps by complementor in subcategory                     | 0.014**<br>(0.0057)    | 0.014**<br>(0.0057)    | 0.014**<br>(0.0057)    |
| App performance                                         | 0.0000095<br>(0.0023)  | 0.000098<br>(0.0024)   | 0.000059<br>(0.0024)   |
| App age                                                 | 0.0020<br>(0.0024)     | 0.0022<br>(0.0024)     | 0.0020<br>(0.0024)     |
| Number of ratings (ln)                                  | -0.0073***<br>(0.0015) | -0.0075***<br>(0.0015) | -0.0074***<br>(0.0015) |
| Rating valence                                          | 0.00034<br>(0.00071)   | 0.00029<br>(0.00071)   | 0.00035<br>(0.00071)   |
| App fixed effects                                       | Yes                    | Yes                    | Yes                    |
| Month fixed effects                                     | Yes                    | Yes                    | Yes                    |
| Number of apps                                          | 2,158                  | 2,158                  | 2,158                  |
| Number of observations                                  | 21,893                 | 21,893                 | 21,893                 |
| R <sup>2</sup>                                          | 0.011                  | 0.011                  | 0.011                  |

*Notes.* Coefficients are reported with robust standard errors, clustered at the level of the app, in parentheses. The constant is estimated but not reported. Coefficients are from linear probability models estimating the likelihood of app withdrawal. Platform ecosystem experience is measured as the log-transformed number of months since the oldest app by a complementor was released. Multihoming is a dummy variable that takes a positive value if a complementor has apps in competing platform ecosystems and is reflective of a lack of an exclusive platform focus

\*  $p < 0.10$ ; \*\*  $p < 0.05$ ; \*\*\*  $p < 0.01$ .

**Table B11. Subsample Analyses Estimating the Effect of PVC on App Introductions for Incumbent Complementors**

| Variable                                                | 1                         | 2                         | 3                         |
|---------------------------------------------------------|---------------------------|---------------------------|---------------------------|
| PVC in subcategory                                      | 0.00028*<br>(0.00017)     | 0.0035***<br>(0.0013)     | 0.000018<br>(0.00016)     |
| Platform ecosystem experience (ln)                      | -0.00078***<br>(0.00023)  | -0.00077***<br>(0.00023)  | -0.00079***<br>(0.00023)  |
| PVC in subcategory x platform ecosystem experience (ln) |                           | -0.00092***<br>(0.00034)  |                           |
| PVC in subcategory x exclusive platform focus           |                           |                           | 0.00080**<br>(0.00033)    |
| App introductions in subcategory                        | -0.000055**<br>(0.000026) | -0.000057**<br>(0.000025) | -0.000055**<br>(0.000026) |
| App withdrawals in subcategory                          | 0.000051<br>(0.000060)    | 0.000052<br>(0.000060)    | 0.000051<br>(0.000060)    |
| Apps by platform provider in subcategory                | -0.00030**<br>(0.00015)   | -0.00030*<br>(0.00015)    | -0.00030**<br>(0.00015)   |
| Subcategory market size (ln)                            | 0.00023<br>(0.00017)      | 0.00025<br>(0.00017)      | 0.00024<br>(0.00017)      |
| Complementor scope                                      | -0.0047***<br>(0.00036)   | -0.0047***<br>(0.00036)   | -0.0047***<br>(0.00036)   |
| Apps by complementor in subcategory                     | 0.0038***<br>(0.00059)    | 0.0038***<br>(0.00059)    | 0.0038***<br>(0.00059)    |
| Complementor performance                                | -0.000063<br>(0.00014)    | 0.000061<br>(0.00014)     | -0.000059<br>(0.00014)    |
| Complementor fixed effects                              | Yes                       | Yes                       | Yes                       |
| Category fixed effects                                  | Yes                       | Yes                       | Yes                       |
| Month fixed effects                                     | Yes                       | Yes                       | Yes                       |
| Number of complementors                                 | 1,072                     | 1,072                     | 1,072                     |
| Number of observations                                  | 575,190                   | 575,190                   | 575,190                   |
| R <sup>2</sup>                                          | 0.0080                    | 0.0081                    | 0.0080                    |

*Notes.* Coefficients are reported with robust standard errors, clustered at the level of the complementor, in parentheses. The constant is estimated but not reported. Coefficients are from linear probability models estimating the likelihood of app introduction.

\*  $p < 0.10$ ; \*\*  $p < 0.05$ ; \*\*\*  $p < 0.01$ .

**Table B12. Subsample Analyses Estimating the Effect of PVC on App Withdrawal for Incumbent Complementors**

| Variable                                                | 1                      | 2                      | 3                      |
|---------------------------------------------------------|------------------------|------------------------|------------------------|
| PVC in subcategory                                      | -0.0029*<br>(0.0017)   | -0.014**<br>(0.0058)   | -0.000011<br>(0.0025)  |
| Platform ecosystem experience (ln)                      | -0.0043*<br>(0.0024)   | -0.0051*<br>(0.0025)   | -0.0043*<br>(0.0032)   |
| PVC in subcategory x platform ecosystem experience (ln) |                        | 0.0030**<br>(0.0014)   |                        |
| PVC in subcategory x exclusive platform focus           |                        |                        | 0.0064**<br>(0.0032)   |
| App introductions in subcategory                        | -0.000047<br>(0.00018) | -0.000023<br>(0.00017) | -0.000037<br>(0.00018) |
| App withdrawals in subcategory                          | 0.00056<br>(0.00051)   | 0.00053<br>(0.00051)   | 0.00061<br>(0.00051)   |
| Apps by platform provider in subcategory                | -0.0039**<br>(0.0015)  | -0.0040**<br>(0.0016)  | -0.0041**<br>(0.0016)  |
| Subcategory market size (ln)                            | 0.00015<br>(0.0042)    | 0.00046<br>(0.0042)    | 0.00037<br>(0.0042)    |
| Complementor scope                                      | -0.0030<br>(0.0020)    | -0.0028<br>(0.0020)    | -0.0029<br>(0.0020)    |
| Apps by complementor in subcategory                     | 0.018***<br>(0.0069)   | 0.018***<br>(0.0069)   | 0.018***<br>(0.0069)   |
| App performance                                         | 0.0017<br>(0.0026)     | 0.0018<br>(0.0026)     | 0.0017<br>(0.0026)     |
| App age                                                 | 0.0047*<br>(0.0029)    | 0.0048*<br>(0.0028)    | 0.0048*<br>(0.0029)    |
| Number of ratings (ln)                                  | -0.0056***<br>(0.0015) | -0.0056***<br>(0.0015) | -0.0057***<br>(0.0015) |
| Rating valence                                          | 0.00036<br>(0.00036)   | 0.00037<br>(0.00037)   | 0.00037<br>(0.00036)   |
| App fixed effects                                       | Yes                    | Yes                    | Yes                    |
| Month fixed effects                                     | Yes                    | Yes                    | Yes                    |
| Number of apps                                          | 1,792                  | 1,792                  | 1,792                  |
| Number of observations                                  | 19,951                 | 19,951                 | 19,951                 |
| R <sup>2</sup>                                          | 0.011                  | 0.012                  | 0.011                  |

*Notes.* Coefficients are reported with robust standard errors, clustered at the level of the app, in parentheses. The constant is estimated but not reported. Coefficients are from linear probability models estimating the likelihood of app withdrawal.

\*  $p < 0.10$ ; \*\*  $p < 0.05$ ; \*\*\*  $p < 0.01$ .
